# Supplementary material for: Dose–response relationship between physical activity and mortality in adults with noncommunicable diseases: a systematic review and meta-analysis of prospective observational studies
Source: PubMed Central journal article supplement (PMC7448980; doi:10.1186/s12966-020-01007-5), 2020-08-26
Supplement: 12966_2020_1007_MOESM4_ESM.pdf [file 12966_2020_1007_MOESM4_ESM.pdf]

**Supplementary file 4. Risk of bias summary.**

|                      | Confounding | Selection of participants | Classification of physical activity | Departures from the intended interventions | Missing data | Measurement of mortality | Selective reporting | Overall bias |
|----------------------|-------------|---------------------------|-------------------------------------|--------------------------------------------|--------------|--------------------------|---------------------|--------------|
| Ammitzbøll 2016      | −           | +                         | ?                                   | −                                          | −            | +                        | +                   | −            |
| Bao 2015             | +           | +                         | ?                                   | +                                          | +            | +                        | +                   | +            |
| Bertram 2011         | +           | +                         | ?                                   | +                                          | +            | +                        | +                   | +            |
| Bradshaw 2014        | +           | +                         | −                                   | +                                          | −            | +                        | +                   | −            |
| Chen 2011            | +           | +                         | ?                                   | +                                          | +            | +                        | +                   | +            |
| de Glas 2014         | +           | +                         | ?                                   | +                                          | +            | ?                        | +                   | +            |
| Holick 2008          | +           | −                         | ?                                   | −                                          | +            | +                        | +                   | −            |
| Holmes 2005          | −           | +                         | ?                                   | −                                          | +            | +                        | +                   | −            |
| Irwin 2008           | −           | +                         | ?                                   | −                                          | +            | +                        | +                   | −            |
| Irwin 2011           | +           | +                         | ?                                   | +                                          | +            | +                        | +                   | +            |
| Maliniak 2018        | +           | +                         | ?                                   | −                                          | +            | +                        | +                   | −            |
| Sternfeld 2009       | −           | −                         | ?                                   | −                                          | −            | +                        | +                   | −            |
| Glenn 2015           | −           | +                         | ?                                   | −                                          | +            | +                        | +                   | −            |
| Gregg 2003           | −           | +                         | −                                   | −                                          | +            | +                        | +                   | −            |
| Hu 2004              | −           | +                         | −                                   | −                                          | +            | +                        | +                   | −            |
| Sluik 2012           | −           | +                         | ?                                   | −                                          | +            | +                        | +                   | −            |
| Sone 2013            | −           | +                         | ?                                   | −                                          | +            | +                        | +                   | −            |
| Tanasescu 2003       | +           | +                         | ?                                   | +                                          | ?            | +                        | +                   | +            |
| Cheng 2018           | −           | +                         | ?                                   | −                                          | +            | +                        | +                   | −            |
| Garcia-Aymerich 2006 | −           | +                         | ?                                   | −                                          | +            | +                        | +                   | −            |
| Gerber 2011          | +           | +                         | ?                                   | +                                          | +            | +                        | +                   | +            |
| Janssen 2006         | +           | +                         | ?                                   | +                                          | +            | +                        | +                   | +            |
| Lahtinen 2018        | +           | +                         | ?                                   | +                                          | +            | +                        | +                   | +            |
| Moholdt 2017         | +           | +                         | ?                                   | +                                          | ?            | +                        | +                   | +            |
| Mons 2014            | −           | +                         | −                                   | +                                          | ?            | +                        | +                   | −            |
| Stewart 2017         | −           | +                         | ?                                   | −                                          | +            | ?                        | +                   | −            |
| Tian 2017            | −           | −                         | −                                   | −                                          | +            | +                        | +                   | −            |
| Wannamethee 2000     | +           | +                         | ?                                   | +                                          | +            | +                        | +                   | +            |

Low: comparable to a well-performed RCT; 
 Moderate: sound evidence but not comparable to a well-performed RCT; 
 Serious: the study has some important problems; 
 Critical: the study is too critical to provide any useful evidence and should not be included in any synthesis; 
 No information: not enough information to reach a judgment.
